# Supplementary material for: A Cellulose-Derived Nanofibrous MnO2-TiO2-Carbon Composite as Anodic Material for Lithium-Ion Batteries
Source: MDPI journal article supplement (doi:10.3390/ma14123411), 2021-06-20
Supplement: s1 [file s1]

# Supplementary Materials: A Cellulose-Derived Nanofibrous MnO<sub>2</sub>-TiO<sub>2</sub>-Carbon Composite as Anodic Material for Lithium-Ion Batteries

Shun Li <sup>1,2,\*</sup>, Ming Yang <sup>1</sup>, Guijin He <sup>1</sup>, Dongmei Qi <sup>3</sup> and Jianguo Huang <sup>1,\*</sup>

<sup>1</sup> Department of Chemistry, Zhejiang University, Hangzhou 310027, China; 21937064@zju.edu.cn (M.Y.); guikinghe@zju.edu.cn (G.H.)

<sup>2</sup> School of Engineering, Zhejiang Agriculture and Forestry University, Hangzhou 311300, China

<sup>3</sup> Analysis Center of Agrobiological and Environmental Sciences, Zhejiang University, Hangzhou 310027, China; qidongmei@zju.edu.cn

\* Correspondence: smoothlee2013@zju.edu.cn (S.L.); jghuang@zju.edu.cn (J.H.); Tel.: +86-571-8795-1202 (J.H.)

**Citation:** Li, S.; Yang, M.; He, G.; Qi, D.; Huang, J. A Cellulose-Derived Nanofibrous MnO<sub>2</sub>-TiO<sub>2</sub>-Carbon Composite as Anodic Material for Lithium-Ion Batteries. *Int. J. Environ. Res. Public Health* **2021**, *14*, 3411. <https://doi.org/10.3390/ma14123411>

Academic Editor: Halina Kaczmarek

Received: 31 May 2021

Accepted: 17 June 2021

Published: 20 June 2021

**Publisher's Note:** MDPI stays neutral with regard to jurisdictional claims in published maps and institutional affiliations.

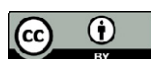

**Copyright:** © 2021 by the authors. Licensee MDPI, Basel, Switzerland. This article is an open access article distributed under the terms and conditions of the Creative Commons Attribution (CC BY) license (<http://creativecommons.org/licenses/by/4.0/>).

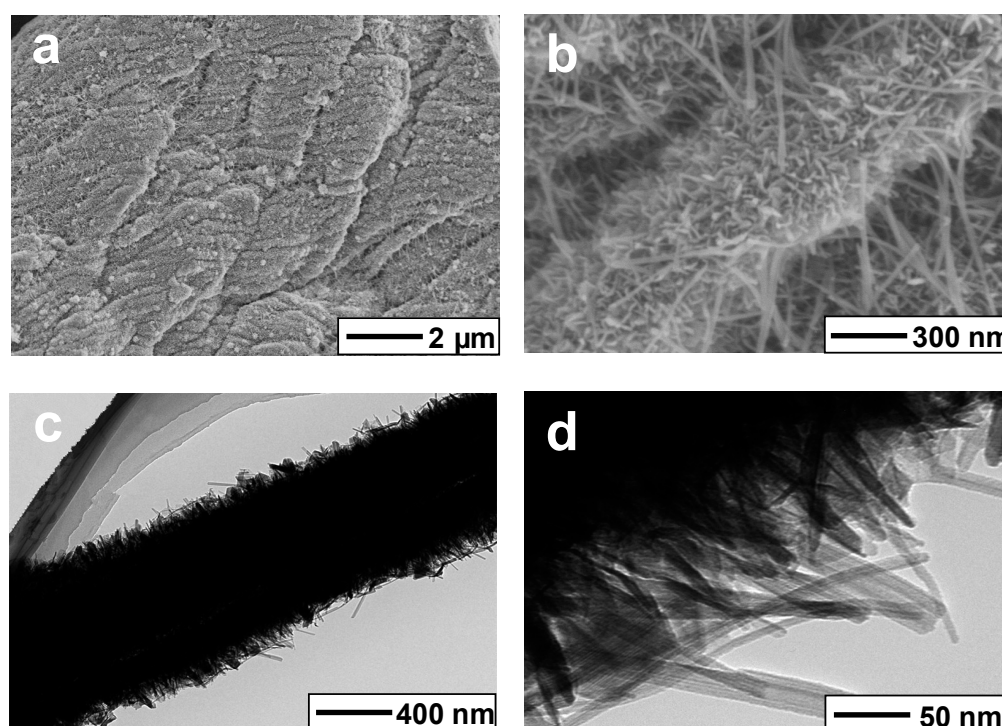

**Figure S1.** Electron micrographs of the nanofibrous MnO<sub>2</sub>-TiO<sub>2</sub>-carbon-37.81% composite derived from the natural cellulose substance. (a) SEM image of the MnO<sub>2</sub>-TiO<sub>2</sub>-carbon-37.81% composite, (b) SEM image of an individual composite nanofiber isolated from the assemblies, (c) and (d) the TEM images of an individual MnO<sub>2</sub>-TiO<sub>2</sub>-carbon-37.81% nanofiber at different magnifications.

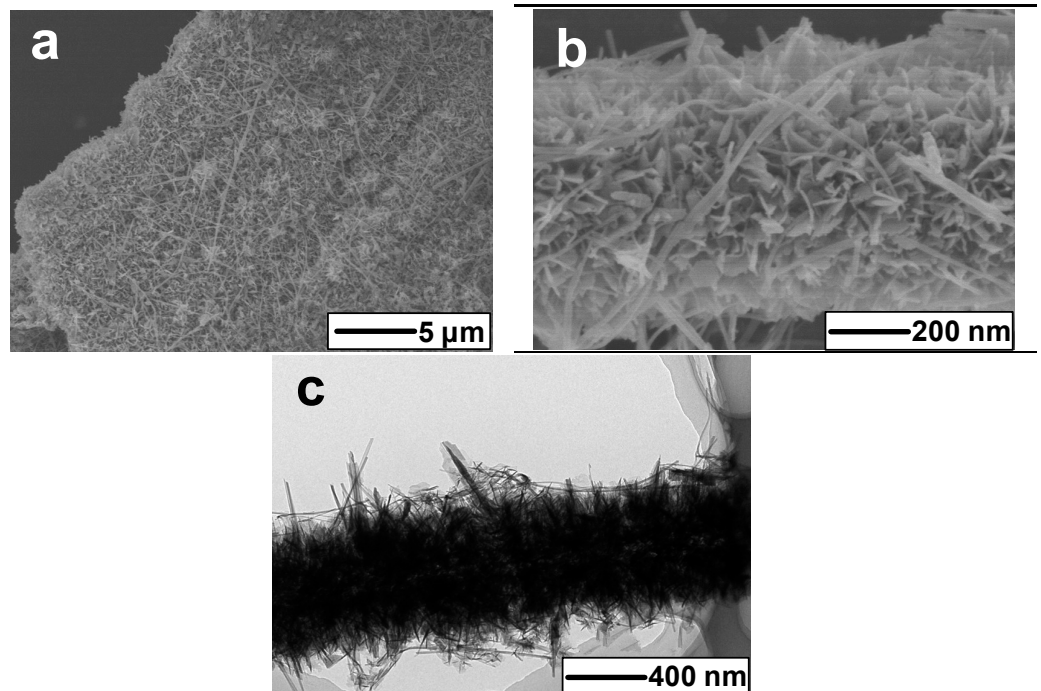

**Figure S2.** Electron micrographs of the nanofibrous MnO<sub>2</sub>-carbon-33.30% composite derived from the natural cellulose substance. (a) SEM image of the MnO<sub>2</sub>-carbon-33.30% composite, (b) SEM and (c) TEM images of an individual composite nanofiber.

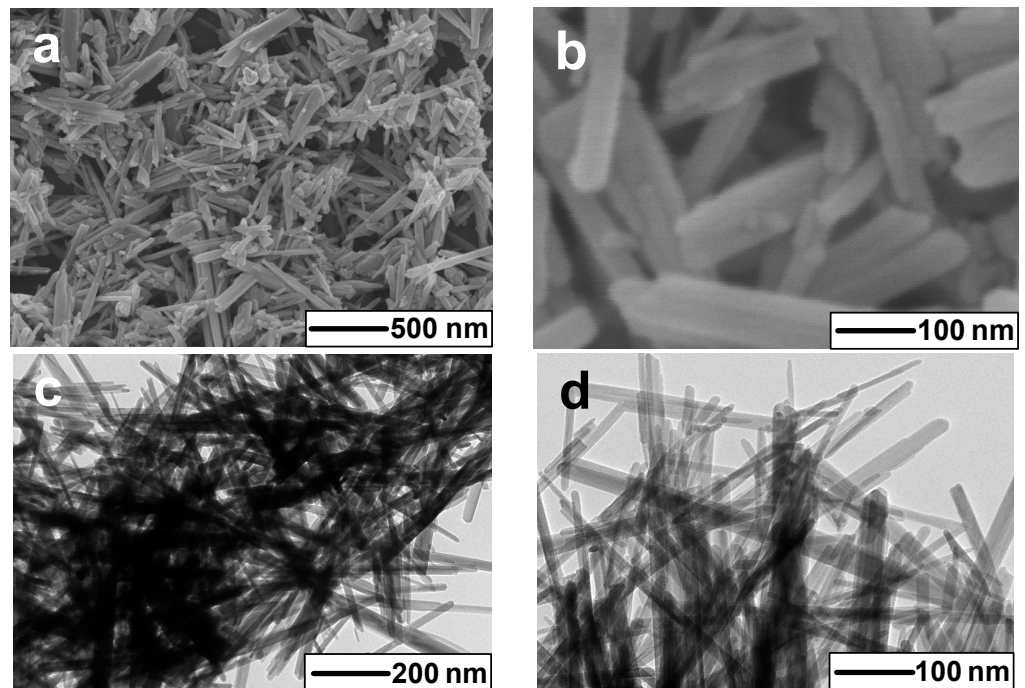

**Figure S3.** (a), (b) SEM and (c), (d) TEM micrographs of the MnO<sub>2</sub>-NPs materials.

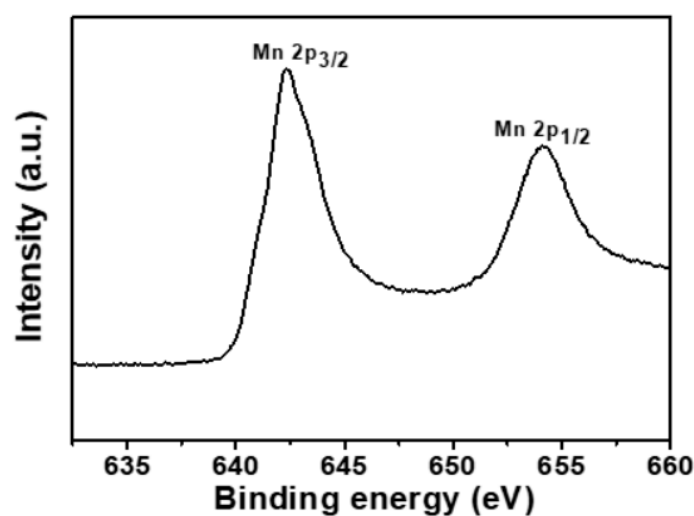

Figure S4. The high-resolution XPS spectra of Mn 2p regions of the MnO<sub>2</sub>-TiO<sub>2</sub>-carbon-37.81% composite.

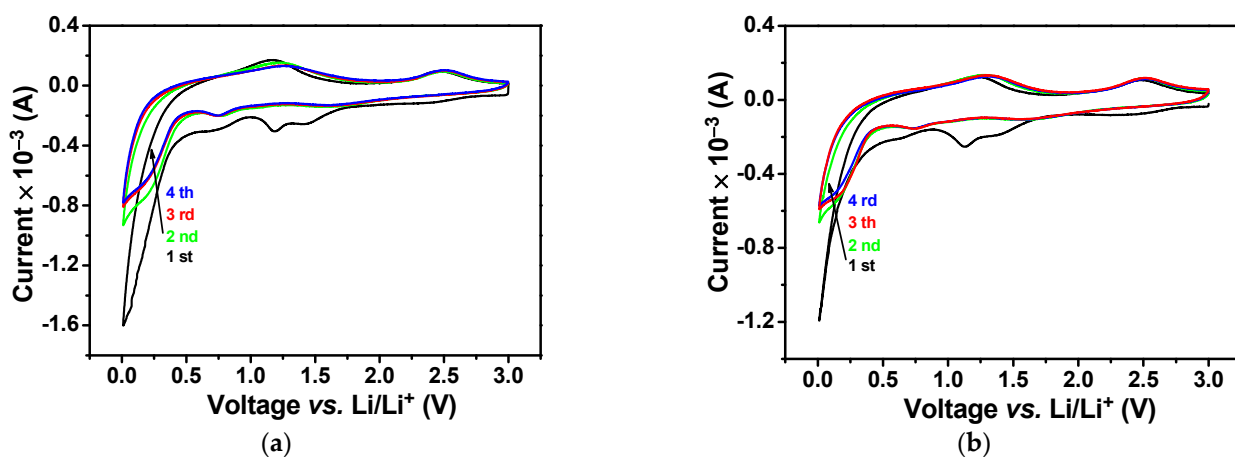

Figure S5. Cyclic voltammetry curves of (a) MnO<sub>2</sub>-TiO<sub>2</sub>-carbon-37.81% and (b) MnO<sub>2</sub>-carbon-33.30% electrodes tested in the initial four charge/discharge cycles at a scan rate of 0.2 mV s<sup>-1</sup> between 0.01 and 3 V (versus Li/Li<sup>+</sup>).

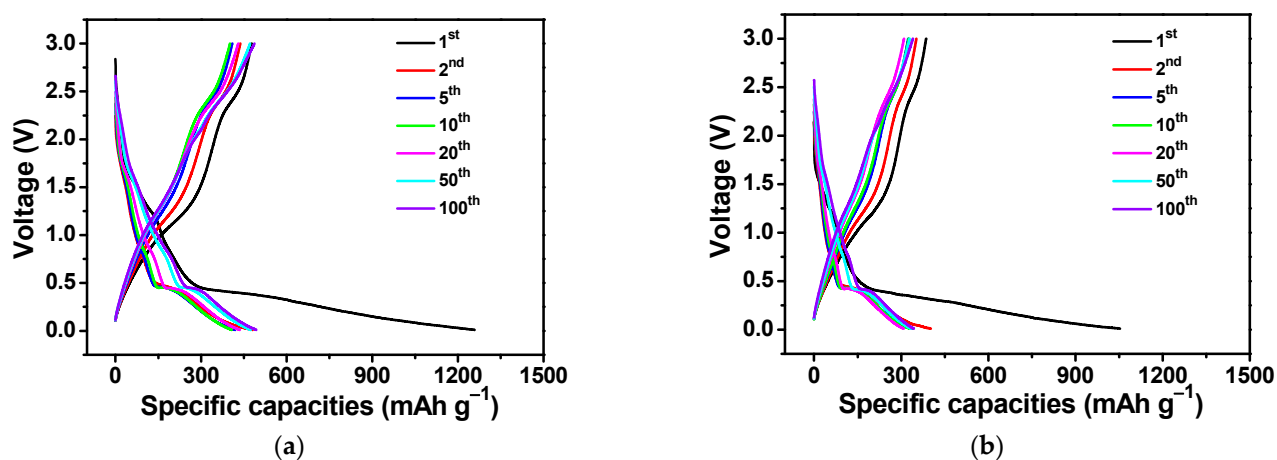

Figure S6. Galvanostatic charge/discharge profiles of (a) MnO<sub>2</sub>-TiO<sub>2</sub>-carbon-37.81% and (b) MnO<sub>2</sub>-carbon-33.30% anode materials measured at a current density of 100 mA g<sup>-1</sup> between 0.01 and 3.0 V.

**Table S1.** Equivalent circuit parameters obtained from fitting the experimental impedance spectra of the MnO<sub>2</sub>-TiO<sub>2</sub>-carbon-47.28%, MnO<sub>2</sub>-carbon-33.30 and TiO<sub>2</sub>-carbon nanocomposite electrodes.

| Samples                                           | R <sub>s</sub> (Ω) | R <sub>ct</sub> (Ω) |
|---------------------------------------------------|--------------------|---------------------|
| MnO <sub>2</sub> -TiO <sub>2</sub> -carbon-47.28% | 8.719              | 46.32               |
| MnO <sub>2</sub> -carbon-33.30                    | 12.34              | 155                 |
| TiO <sub>2</sub> -carbon                          | 12.71              | 231.7               |

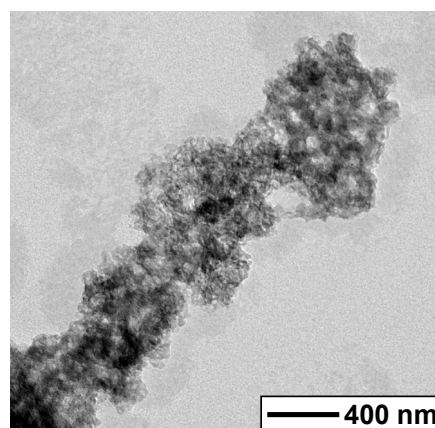

**Figure S7.** TEM image of the MnO<sub>2</sub>-TiO<sub>2</sub>-carbon-47.28% anode material after 200 charge/discharge cycles.
